# Supplementary material
Source: PubMed Central journal article supplement (PMC3193483)
Supplement: cr2011112x2.pdf [file cr2011112x2.pdf]

## Supplementary information, Figure S2

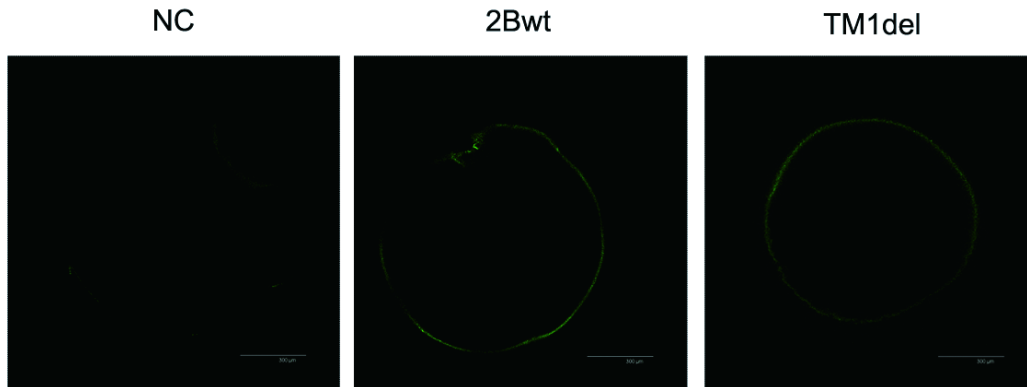

**Figure S2** Immunofluorescent detection of 2B proteins in *Xenopus* oocytes. Oocytes were fixed and stained with an anti-HA antibody 24 h after the indicated cRNA was injected. NC, non-injected control cells. The images were acquired on a Leica TCS SP2 confocal microscope (Leica Microsystems).
